# Supplementary material for: Real-World Evaluation of Calcimimetics for the Treatment of Secondary Hyperparathyroidism in Chronic Kidney Disease, in an Italian Clinical Setting
Source: MDPI journal article supplement (doi:10.3390/healthcare10040709), 2022-04-11
Supplement: s1 [file s1]

**Supplementary Table S1. Baseline characteristics of Cinacalcet- and Etelcalcetide-treated cohorts, Post PSM**

|                                        | <b>Cinacalcet-<br/>treated cohort<br/>N=432</b> | <b>Etelcalcetide-treated<br/>cohort<br/>N=432</b> | <b>P-value</b> |
|----------------------------------------|-------------------------------------------------|---------------------------------------------------|----------------|
| Age at the index-date, mean (SD)       | 63.7 (15.0)                                     | 64.4 (14.5)                                       | 0.530          |
| Male, n (%)                            | 270 (62.5)                                      | 276 (63.9)                                        | 0.672          |
| CCI, mean (SD)                         | 1.1 (1.1)                                       | 1.1 (1.1)                                         | 0.877          |
| Co-morbidities/clinical manifestations |                                                 |                                                   |                |
| Diabetes mellitus, n (%)               | 99 (22.9)                                       | 93 (21.5)                                         | 0.623          |
| Hypertension, n (%)                    | 336 (77.8)                                      | 323 (74.8)                                        | 0.299          |
| CVD, n (%)                             | 60 (13.9)                                       | 56 (13.0)                                         | 0.690          |
| Fractures, n (%)                       | 4 (0.9)                                         | 4 (0.9)                                           | 1.000          |
| Hypercalcemia, n (%)                   | 0 (0.0)                                         | 0 (0.0)                                           | -              |
| Parathyroidectomy, n (%)               | NI                                              | 0 (0.0)                                           | 0.317          |
| Malignant tumors, n (%)                | NI                                              | 5 (1.2)                                           | 0.477          |
| Hypocalcemia, n (%)                    | 0 (0.0)                                         | 0 (0.0)                                           | -              |
| Treatments                             |                                                 |                                                   |                |
| ACE inhibitors, n (%)                  | 129 (29.9)                                      | 96 (22.2)                                         | <0.050         |
| Sartans, n (%)                         | 90 (20.8)                                       | 103 (23.8)                                        | 0.288          |
| Beta Blockers, n (%)                   | 233 (53.9)                                      | 229 (53.0)                                        | 0.785          |
| Calcium supplementation, n (%)         | 43 (10.0)                                       | 40 (9.3)                                          | 0.729          |
| Phosphorus binders, n (%)              | 277 (64.1)                                      | 292 (67.6)                                        | 0.282          |
| Vitamin D in active form, n (%)        | 110 (25.5)                                      | 109 (25.2)                                        | 0.938          |
| Vitamin D in inactive form, n (%)      | 270 (62.5)                                      | 254 (58.8)                                        | 0.265          |
| ESA, n (%)                             | 339 (78.5)                                      | 351 (81.3)                                        | 0.309          |
| Prednisolone and other steroids, n (%) | 54 (12.5)                                       | 53 (12.3)                                         | 0.918          |
| Anti-osteoporotic medications, n (%)   | 6 (1.4)                                         | 5 (1.2)                                           | 0.762          |

NI (not issuable).

**Supplementary Table S2. Baseline characteristics of Cinacalcet- and Etelcalcetide-treated naive patients, Post PSM (1:2)**

|                                        | <b>Cinacalcet-<br/>treated cohort<br/>N=552</b> | <b>Etelcalcetide-treated<br/>cohort<br/>N=276</b> | <b>P-value</b> |
|----------------------------------------|-------------------------------------------------|---------------------------------------------------|----------------|
| Age at the index-date, mean (SD)       | 65.2 (14.3)                                     | 65.4 (14.7)                                       | 0.821          |
| Male, n (%)                            | 340 (61.6)                                      | 177 (64.1)                                        | 0.477          |
| CCI, mean (SD)                         | 1.2 (1.2)                                       | 1.1 (1.1)                                         | 0.751          |
| Co-morbidities/clinical manifestations |                                                 |                                                   |                |
| Diabetes mellitus, n (%)               | 165 (29.9)                                      | 71 (25.7)                                         | 0.211          |
| Hypertension, n (%)                    | 432 (78.3)                                      | 213 (77.2)                                        | 0.722          |
| CVD, n (%)                             | 86 (15.6)                                       | 41 (14.9)                                         | 0.785          |
| Fractures, n (%)                       | 8 (1.4)                                         | NI                                                | 0.668          |
| Hypercalcemia, n (%)                   | NI                                              | 0 (0.0)                                           | 0.479          |
| Parathyroidectomy, n (%)               | NI                                              | 0 (0.0)                                           | 0.479          |
| Malignant tumors, n (%)                | 9 (1.6)                                         | NI                                                | 0.283          |
| Hypocalcemia, n (%)                    | 0 (0.0)                                         | 0 (0.0)                                           | -              |

|                                        |            |            |       |
|----------------------------------------|------------|------------|-------|
| Treatments                             |            |            |       |
| ACE inhibitors, n (%)                  | 176 (31.9) | 72 (26.1)  | 0.086 |
| Sartans, n (%)                         | 122 (22.1) | 67 (24.3)  | 0.482 |
| Beta Blockers, n (%)                   | 264 (47.8) | 148 (53.6) | 0.116 |
| Calcium supplementation, n (%)         | 50 (9.1)   | 22 (8.0)   | 0.601 |
| Phosphorus binders, n (%)              | 323 (58.5) | 154 (55.8) | 0.456 |
| Vitamin D in active form, n (%)        | 166 (30.1) | 75 (27.2)  | 0.387 |
| Vitamin D in inactive form, n (%)      | 327 (59.2) | 162 (58.7) | 0.881 |
| ESA, n (%)                             | 455 (82.4) | 233 (84.4) | 0.471 |
| Prednisolone and other steroids, n (%) | 68 (12.3)  | 36 (13.0)  | 0.767 |
| Anti-osteoporotic medications, n (%)   | 8 (1.4)    | 4 (1.4)    | 1.000 |
| NI (not issuable).                     |            |            |       |
